# Supplementary material for: AI based colorectal disease detection using real-time screening colonoscopy
Source: PubMed Central journal article supplement — Precis Clin Med. 2021 May 20;4(2):109–18. doi: 10.1093/pcmedi/pbab013 (PMC8982552; doi:10.1093/pcmedi/pbab013), 2021-05-20
Supplement: pbab013_supplemental_file.pdf [file pbab013_supplemental_file.pdf]

# Supplementary files

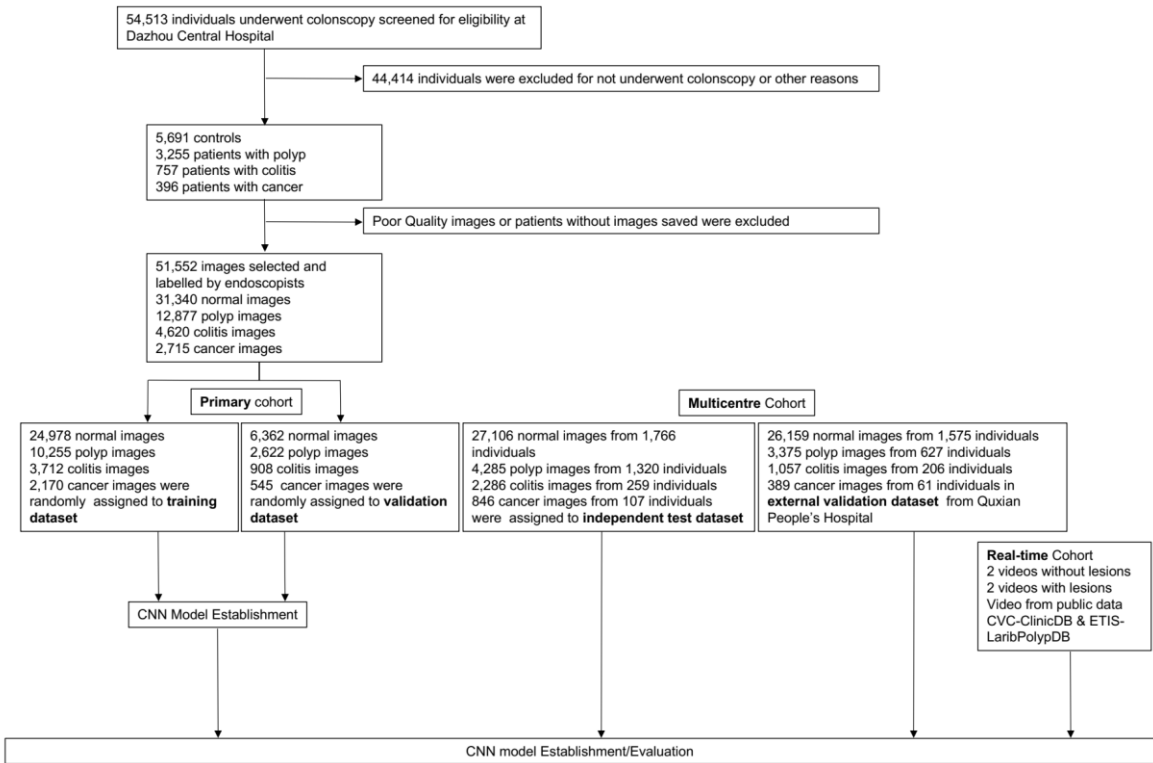

Supplementary Fig. 1 Flowchart of this study.

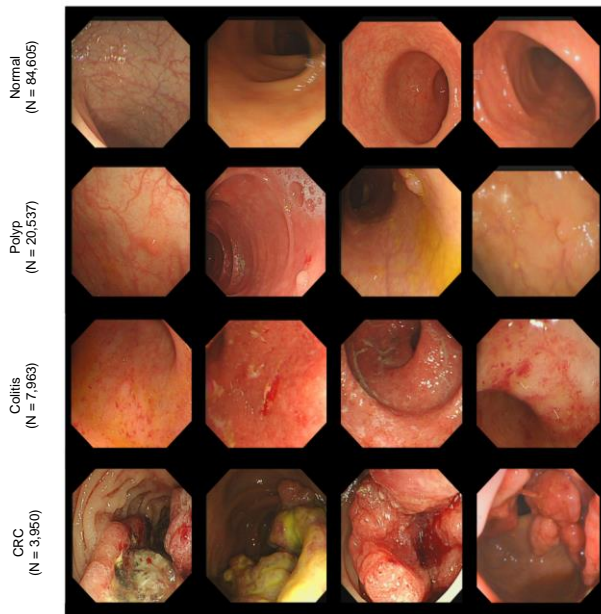

**Supplementary Fig. 2** Typical pictures of colorectal diseases.

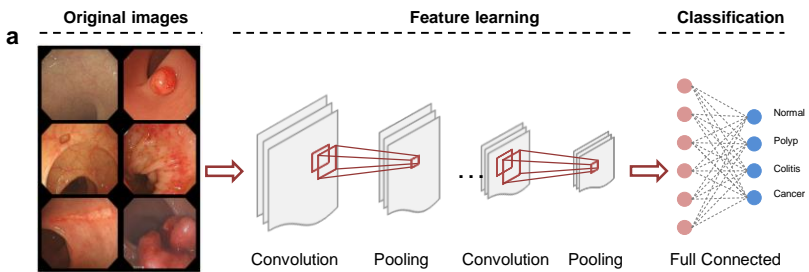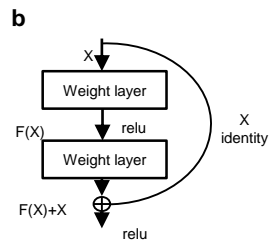

**Supplementary Fig. 3** Patterns of the convolutional neural network.

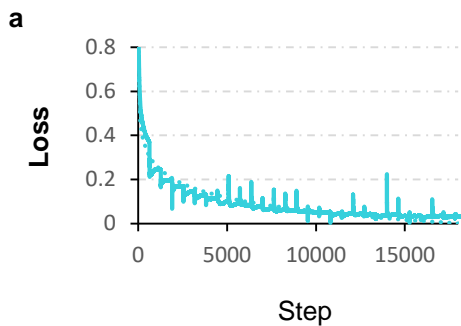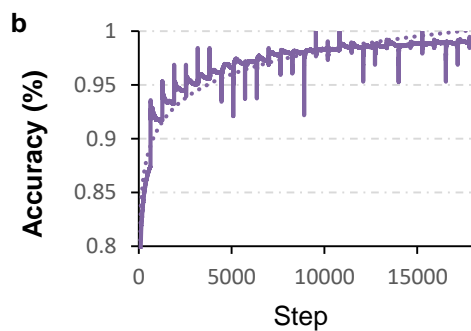

**Supplementary Fig. 4** Performance development in the training dataset. In the 18,444 steps training process of the whole model, (a) shows the loss of cross entropy, (b) shows the improvement of accuracy.

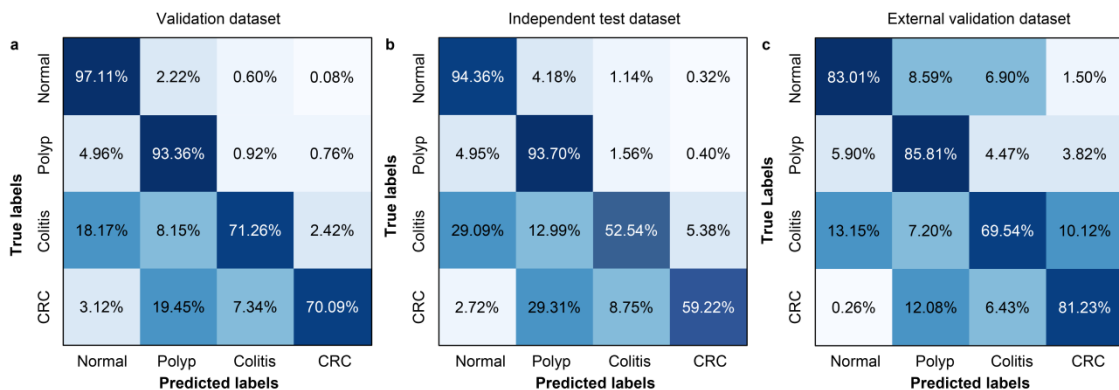

**Supplementary Fig. 5** Diagnostic performance of CNN2 model in multi-class classification. **a** Confusion Matrix of the CNN2 model in validation dataset. **b** Confusion matrix of the CNN2 model in independent test dataset. **c** Confusion matrix of the CNN2 model in external validation dataset.

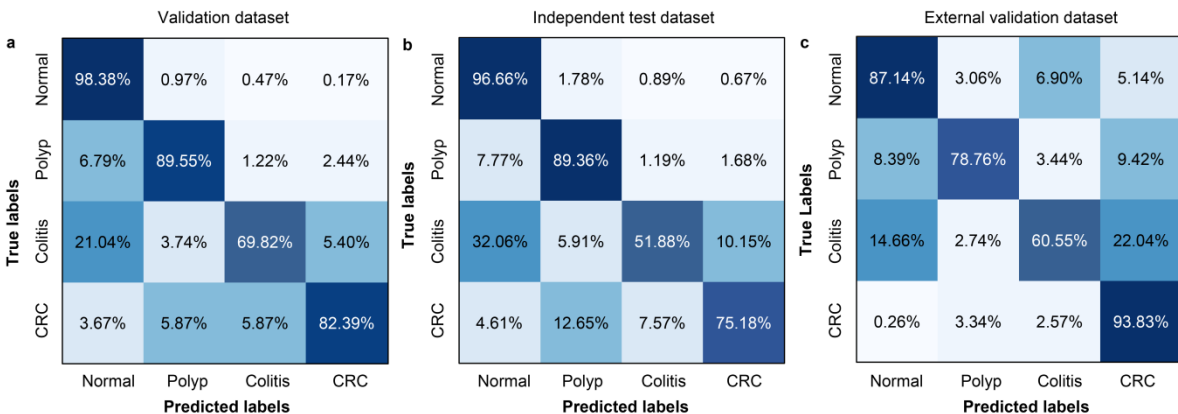

**Supplementary Fig. 6** Diagnostic performance of CNN3 model in multi-class classification. **a** Confusion matrix of the CNN3 model in validation dataset. **b** Confusion matrix of the CNN3 model in independent test dataset. **c** Confusion matrix of the CNN3 model in external validation dataset.

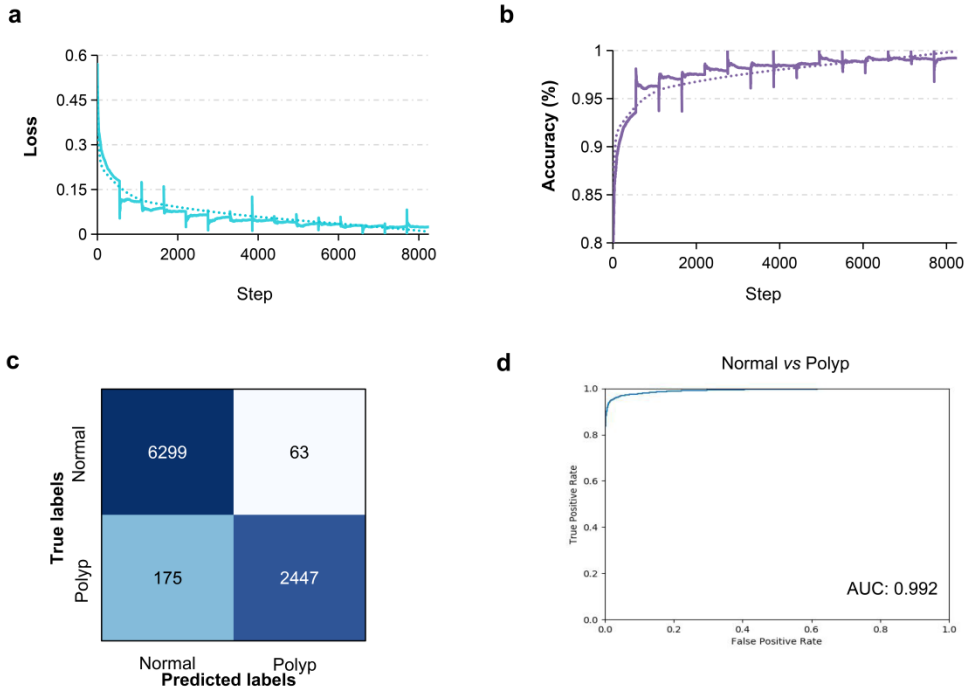

**Supplementary Fig. 7** Performance of polyp classification in CNN1-NPo model. In the 8,250 steps training process of the whole model, **(a)** shows the loss of cross entropy, **(b)** shows the improvement of accuracy. **c** Confusion matrix of the CNN1-NPo model in classifying of normal and polyp in the validation dataset. **d** Corresponding ROC curves. CNN1-NPo model represents the ResNet-50 classifying the normal and polyp.

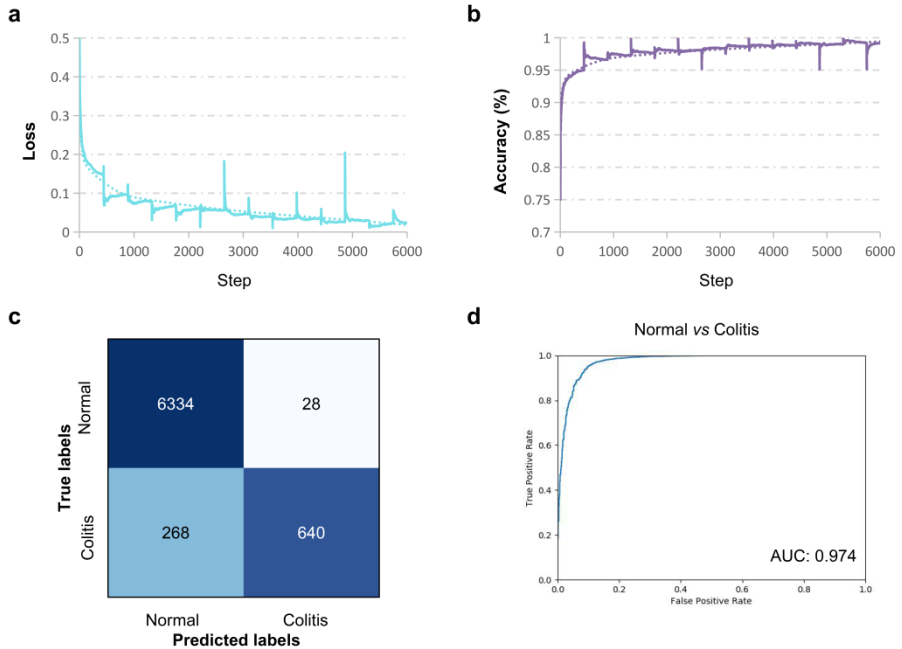

**Supplementary Fig. 8** Diagnostic performance of normal vs colitis in CNN1-NCo model. In the 6,188 steps training process of the whole model, **(a)** shows the loss of cross entropy, **(b)** shows the improvement of accuracy. **(c)** Confusion matrix of the CNN1-NCo model in classifying of normal and colitis in the validation dataset. **(d)** Corresponding ROC curves. CNN1-NCo model represents the ResNet-50 classifying the normal and colitis.



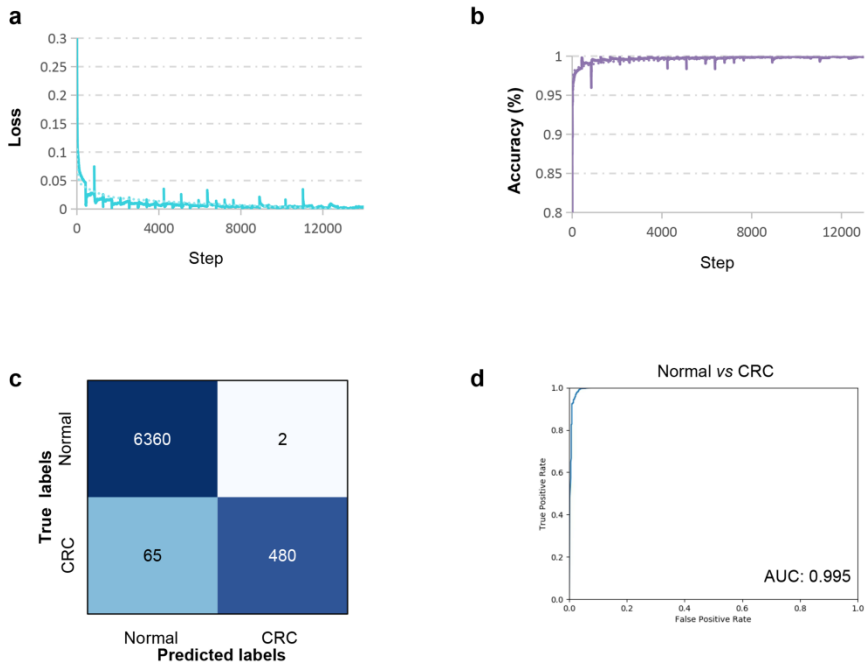

**Supplementary Fig. 9** Diagnostic performance of normal vs cancer in CNN1-NCa model. In the 13,992 steps training process of the whole model, **(a)** shows the loss of cross entropy, **(b)** shows the improvement of accuracy.

**c** Confusion matrix of the CNN1-NCa model in classifying of normal and cancer in the validation dataset. **d** Corresponding ROC curves. CNN1-NCa model represents the ResNet-50 classifying the normal and CRC.

Adenoma  
N = 1536

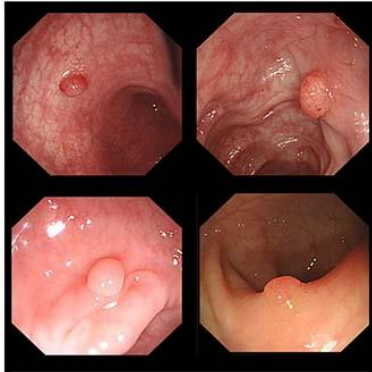

Hyperplastic  
N = 3580

**Supplementary Fig. 10** Typical picture of adenoma and hyperplastic.

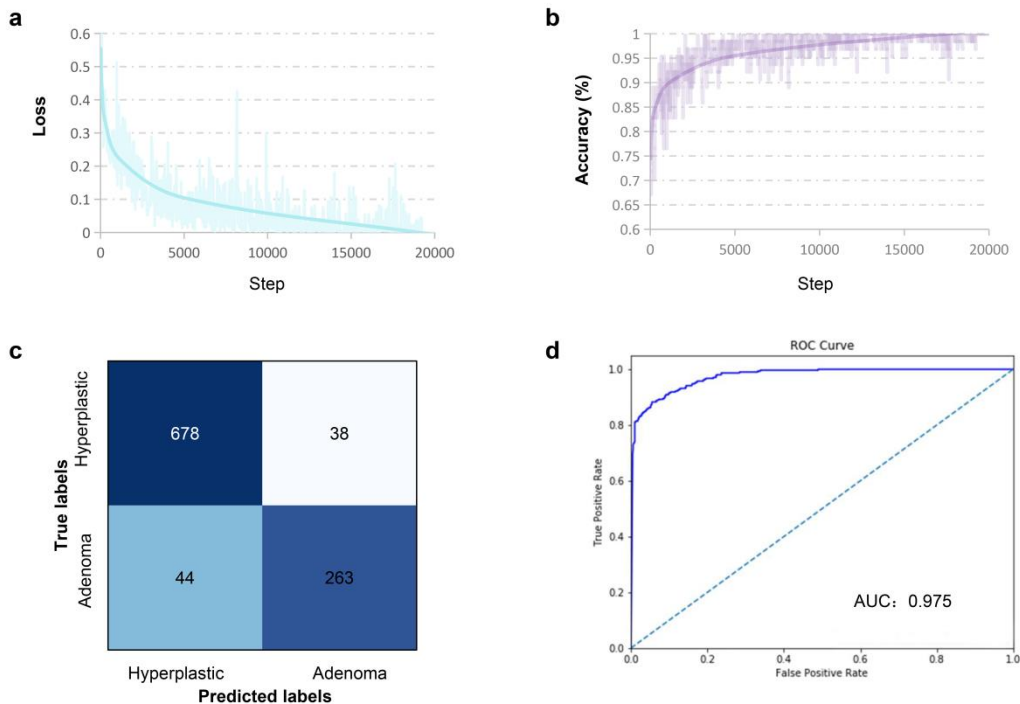

**Supplementary Fig. 11** Performance of polyp subgroup classification in CNN1-HA model. In the 19,995 steps training process of the whole model, **(a)** shows the loss of cross entropy, **(b)** shows the improvement of accuracy. **c** Confusion matrix of the CNN1-HA model in classifying of hyperplastic polyp and adenoma polyp in the validation dataset. **d** Corresponding ROC curves. CNN1-HA model represents the ResNet-50 classifying the hyperplastic and adenomatous polyp.

**Supplementary Table 1.** Characteristics of the subjects

| Characteristics           | Dazhou Central Hospital cohort  |                          | Quxian People's Hospital cohort |
|---------------------------|---------------------------------|--------------------------|---------------------------------|
|                           | Training and Validation dataset | Independent test dataset | External validation dataset     |
| Age, mean $\pm$ SD, years | 52.4 $\pm$ 13.2                 | 52.7 $\pm$ 12.7          | 53.3 $\pm$ 13.4                 |
| Sex, n (%)                |                                 |                          |                                 |
| Female                    | 5,031 (49.8%)                   | 1,732 (50.2%)            | 1,152 (47.0%)                   |
| Male                      | 5,068 (50.2%)                   | 1,720 (49.8%)            | 1,301 (53.0%)                   |
| Normal, n (%)             | 5,691 (56.4%)                   | 1,766 (51.2%)            | 1,575 (63.8%)                   |
| Polyp, n (%)              | 3,255 (32.2%)                   | 1,320 (38.2%)            | 627 (25.4%)                     |
| Colitis, n (%)            | 757 (7.5%)                      | 259 (7.5%)               | 206 (8.3%)                      |
| Cancer, n (%)             | 396 (3.9%)                      | 107 (3.1%)               | 61 (2.5%)                       |

**Supplementary Table 2.** Summary of CNN1 model performance in discriminating multi-class in validation dataset

| Items        | Support Images | Precision            | Recall               | F1-score             | Accuracy             |
|--------------|----------------|----------------------|----------------------|----------------------|----------------------|
| Normal       | 6,362          | 0.960 (0.955, 0.965) | 0.975 (0.972, 0.978) | 0.967 (0.963, 0.971) |                      |
| Polyp        | 2,622          | 0.938 (0.929, 0.947) | 0.911 (0.900, 0.922) | 0.924 (0.914, 0.934) |                      |
| Colitis      | 908            | 0.801 (0.775, 0.827) | 0.794 (0.768, 0.820) | 0.797 (0.771, 0.823) |                      |
| Cancer       | 545            | 0.820 (0.788, 0.852) | 0.794 (0.760, 0.828) | 0.807 (0.774, 0.840) | 0.934 (0.929, 0.939) |
| Macro avg    | 10,437         | 0.880 (0.874, 0.886) | 0.869 (0.863, 0.875) | 0.874 (0.868, 0.880) |                      |
| Weighted avg | 10,437         | 0.933 (0.928, 0.938) | 0.934 (0.929, 0.939) | 0.933 (0.928, 0.938) |                      |

95% confidence intervals are included in brackets

**Supplementary Table 3.** Summary of CNN1 model performance in discriminating multi-class in independent test dataset

| Items        | Support Images | Precision            | Recall               | F1-score             | Accuracy             |
|--------------|----------------|----------------------|----------------------|----------------------|----------------------|
| Normal       | 27,106         | 0.981 (0.979, 0.983) | 0.838 (0.834, 0.842) | 0.904 (0.901, 0.907) |                      |
| Polyp        | 4,285          | 0.737 (0.727, 0.747) | 0.903 (0.894, 0.192) | 0.812 (0.800, 0.824) |                      |
| Colitis      | 2,286          | 0.330 (0.311, 0.349) | 0.735 (0.717, 0.753) | 0.455 (0.435, 0.475) |                      |
| Cancer       | 846            | 0.600 (0.567, 0.633) | 0.710 (0.680, 0.740) | 0.650 (0.628, 0.682) | 0.836 (0.832, 0.840) |
| Macro avg    | 34,523         | 0.662 (0.657, 0.667) | 0.797 (0.793, 0.801) | 0.705 (0.700, 0.710) |                      |
| Weighted avg | 34,523         | 0.898 (0.895, 0.901) | 0.836 (0.832, 0.840) | 0.856 (0.852, 0.860) |                      |

95% confidence intervals are included in brackets

**Supplementary Table 4.** Summary of CNN1 model performance in discriminating multi-class in external validation dataset

| Items        | Support Images | Precision            | Recall               | F1-score             | Accuracy             |
|--------------|----------------|----------------------|----------------------|----------------------|----------------------|
| Normal       | 26,159         | 0.990 (0.989, 0.991) | 0.973 (0.971, 0.975) | 0.981 (0.962, 1.000) |                      |
| Polyp        | 3,375          | 0.814 (0.801, 0.827) | 0.976 (0.971, 0.981) | 0.888 (0.878, 0.898) |                      |
| Colitis      | 1,057          | 0.918(0.902, 0.934)  | 0.793 (0.769, 0.817) | 0.851 (0.830, 0.872) |                      |
| Cancer       | 389            | 0.991 (0.982, 1.000) | 0.810 (0.771, 0.849) | 0.891 (0.860, 0.922) | 0.965 (0.963, 0.967) |
| Macro avg    | 30,980         | 0.928 (0.925, 0.931) | 0.888 (0.891, 0.891) | 0.903 (0.900, 0.906) |                      |
| Weighted avg | 30,980         | 0.968 (0.966, 0.970) | 0.965 (0.963, 0.967) | 0.965 (0.963, 0.967) |                      |

95% confidence intervals are included in brackets

**Supplementary Table 5.** Performance of different model in classification of normal, polyp, colitis and CRC in validation dataset

|           | Items     | Normal               | Polyp                | Colitis              | CRC                  |
|-----------|-----------|----------------------|----------------------|----------------------|----------------------|
| Precision | ResNet-50 | 0.960 (0.955,0.965)  | 0.938 (0.928, 0.948) | 0.801 (0.775, 0.827) | 0.820 (0.790, 0.850) |
|           | VGG16     | 0.952 (0.947, 0.957) | 0.884 (0.872, 0.896) | 0.864 (0.842, 0.886) | 0.890 (0.864, 0.916) |
|           | VGG19     | 0.941 (0.935, 0.947) | 0.944 (0.934, 0.954) | 0.871 (0.849, 0.893) | 0.784 (0.749, 0.819) |
| Recall    | ResNet-50 | 0.975 (0.972, 0.978) | 0.911(0.901, 0.921)  | 0.794 (0.768, 0.820) | 0.794 (0.760, 0.828) |
|           | VGG16     | 0.971 (0.967, 0.975) | 0.934 (0.924, 0.944) | 0.713 (0.683, 0.743) | 0.701 (0.663, 0.739) |
|           | VGG19     | 0.984 (0.981, 0.987) | 0.895 (0.884, 0.906) | 0.698 (0.669, 0.727) | 0.824 (0.792, 0.856) |
| F1-score  | ResNet-50 | 0.967 (0.963, 0.971) | 0.924 (0.914, 0.934) | 0.797 (0.771, 0.823) | 0.807 (0.774, 0.840) |
|           | VGG16     | 0.961 (0.956, 0.966) | 0.908 (0.897, 0.919) | 0.781 (0.754, 0.808) | 0.784 (0.749, 0.819) |
|           | VGG19     | 0.962 (0.957, 0.967) | 0.919 (0.909, 0.929) | 0.775 (0.748, 0.802) | 0.804 (0.771, 0.837) |
| Accuracy  | ResNet-50 | 0.934 (0.929, 0.939) |                      |                      |                      |
|           | VGG16     | 0.925 (0.920, 0.930) |                      |                      |                      |
|           | VGG19     | 0.928 (0.923, 0.933) |                      |                      |                      |

95% confidence intervals are included in brackets



**Supplementary Table 6.** Summary of CNN1 model performance in discriminating normal and different large intestinal diseases

|          | Items        | Support Images | Precision            | Recall               | F1-score             | AUC                  | Accuracy             |
|----------|--------------|----------------|----------------------|----------------------|----------------------|----------------------|----------------------|
| CNN1-NPo | Polyp        | 2,622          | 0.975 (0.968, 0.982) | 0.933 (0.923, 0.943) | 0.954 (0.946, 0.962) | 0.992 (0.990, 0.994) | 0.966 (0.963, 0.969) |
|          | Normal       | 6,362          | 0.973 (0.969, 0.977) | 0.990 (0.988, 0.992) | 0.981 (0.978, 0.984) |                      |                      |
|          | Macro avg    | 8,984          | 0.974 (0.971, 0.977) | 0.962 (0.958, 0.966) | 0.968 (0.965, 0.971) |                      |                      |
|          | Weighted avg | 8,984          | 0.974 (0.971, 0.977) | 0.973 (0.970, 0.976) | 0.973 (0.970, 0.976) |                      |                      |
| CNN1-NCo | Colitis      | 908            | 0.958 (0.945, 0.971) | 0.705 (0.675, 0.735) | 0.812 (0.786, 0.838) | 0.974 (0.970, 0.978) | 0.959 (0.954, 0.964) |
|          | Normal       | 6,362          | 0.959 (0.954, 0.964) | 0.996 (0.995, 0.997) | 0.977 (0.974, 0.980) |                      |                      |
|          | Macro avg    | 7,270          | 0.959 (0.954, 0.964) | 0.851 (0.843, 0.859) | 0.895 (0.888, 0.902) |                      |                      |
|          | Weighted avg | 7,270          | 0.958 (0.953, 0.963) | 0.960 (0.955, 0.965) | 0.956 (0.951, 0.961) |                      |                      |
| CNN1-NCa | CRC          | 545            | 0.996 (0.992, 1.000) | 0.881 (0.854, 0.908) | 0.935 (0.914, 0.956) | 0.995 (0.993, 0.997) | 0.990 (0.988, 0.992) |
|          | Normal       | 6,362          | 0.990 (0.988, 0.992) | 0.999 (0.998, 1.000) | 0.994 (0.992, 0.996) |                      |                      |
|          | Macro avg    | 6,907          | 0.993 (0.991, 0.995) | 0.940 (0.934, 0.946) | 0.965 (0.960, 0.970) |                      |                      |
|          | Weighted avg | 6,907          | 0.990 (0.988, 0.992) | 0.990 (0.988, 0.992) | 0.989 (0.987, 0.991) |                      |                      |

95% confidence intervals are included in brackets

Abbreviations: AUC, area under the curve; PPV, positive predictive value; NPV, negative predictive value

**Supplementary Table 7.** All CNN models in this study and their training steps

| Model    | Algorithm | Object                                          | Training steps (Steps) |
|----------|-----------|-------------------------------------------------|------------------------|
| CNN1     | ResNet-50 | discriminate normal, polyp, colitis, and CRC    | 18,444                 |
| CNN1-NPo | ResNet-50 | discriminate normal and polyp                   | 8,250                  |
| CNN1-NCo | ResNet-50 | discriminate normal and colitis                 | 6,188                  |
| CNN1-NCa | ResNet-50 | discriminate normal and CRC                     | 13,992                 |
| CNN1-HA  | ResNet-50 | discriminate hyperplastic and adenomatous polyp | 19,995                 |
| CNN2     | VGG16     | discriminate normal, polyp, colitis, and CRC    | 16,536                 |
| CNN3     | VGG19     | discriminate normal, polyp, colitis, and CRC    | 13,356                 |
